# Supplementary material for: Candesartan, an angiotensin-II receptor blocker, ameliorates insulin resistance and hepatosteatosis by reducing intracellular calcium overload and lipid accumulation
Source: PubMed Central journal article supplement (PMC10238434; doi:10.1038/s12276-023-00982-6), 2023-05-01
Supplement: 12276_2023_982_MOESM1_ESM.pdf [file 12276_2023_982_MOESM1_ESM.pdf]

## **Candesartan, an angiotensin-II receptor blocker, ameliorates insulin resistance and hepatosteatosis by reducing intracellular calcium overload and lipid accumulation**

Jin Wook Lee<sup>1,2</sup>, Hyun-Oh Gu<sup>1,2</sup>, Yunshin Jung<sup>2</sup>, YunJae Jung<sup>2,3</sup>, Seung-Yong Seo<sup>4</sup>, Jeong-Hee Hong<sup>1</sup>, In-Sun Hong<sup>5</sup>, Dae Ho Lee<sup>6</sup>, Ok-Hee Kim<sup>1\*</sup>, and Byung-Chul Oh<sup>1,2\*</sup>

<sup>1</sup>Department of Physiology, Lee Gil Ya Cancer and Diabetes Institute, Gachon College of Medicine, Incheon, 21999, Republic of Korea

<sup>2</sup>Department of Health Sciences and Technology (GAIHST), Gachon University, Incheon 21999, Korea,

<sup>3</sup>Department of Microbiology, Lee Gil Ya Cancer and Diabetes Institute, Gachon University College of Medicine, Incheon, 21999, Republic of Korea

<sup>4</sup>College of Pharmacy, Gachon University, Incheon, 21936, Republic of Korea

<sup>5</sup>Department of Molecular Medicine, Lee Gil Ya Cancer and Diabetes Institute, Gachon University College of Medicine, Incheon, 21999, Republic of Korea

<sup>6</sup>Department of Internal Medicine, Gachon University Gil Medical Center, Incheon, 21565, Republic of Korea

### **Corresponding authors:**

Address correspondence to Byung-Chul Oh ([bcoh@gachon.ac.kr](mailto:bcoh@gachon.ac.kr)) and ([ohkim323@gmail.com](mailto:ohkim323@gmail.com))

## **Supplementary Materials and Methods**

### **Glucose tolerance test and insulin tolerance test**

IP-GTT was performed by intraperitoneal injection of glucose (1 g/kg body weight) after a 16 h fast. Blood was collected from a small incision at the tip of the tail at 0, 15, 30, 60, and 90 min after glucose injection. Blood glucose levels were measured with a blood glucometer (Accu-Check Aviva, Roche). IP-ITT was performed by intraperitoneal injection of insulin (0.75 U/kg body weight; Actrapid Penfill, Novo Nordisk) after a 4 h fast. Blood glucose levels were measured at 0, 15, 30, 60, and 120 min after insulin injection. HOMA-IR was calculated using the following formula: (fasting insulin × fasting glucose)/405.

### **Determination of body composition and liver fat content**

The body composition of mice was measured using a nuclear magnetic resonance imaging technique (Minispec Live Mice Analyzer (LF50), Bruker) at the end of the experiments. Frozen liver tissues were homogenized in modified RIPA buffer. Triglyceride contents and total proteins in liver lysates were measured with AU480 biochemistry. Triglyceride contents were normalized by the total protein concentration.

### **Serum and urine biochemical assay**

At the end of the experiments, the mice were fasted for 16 h and refed with an HFD before receiving isoflurane. Abdominal aorta blood was obtained. Liver, kidney, and adipose tissues were dissected and stored at  $-80^{\circ}\text{C}$ . Serum biochemical analyses of ALT, AST, TG, total cholesterol, LDL-cholesterol, and HDL-cholesterol were performed as described previously using a Model AU-480 (Beckman Coulter, Fullerton, CA, USA).

### **Monitoring of subcellular localization of AKT PH domain**

CHO cells or HepG2 cells were transfected with cDNA encoding hAKT PHD (residues 1–144) using Lipofectamine (Life Technologies) as described previously<sup>1</sup>. To monitor the subcellular localization of endogenous AKT, we subjected liver sections to antigen retrieval with 10 mM Tris/HCl (pH 9.0) for 20 min, followed by treatment with serum-free protein blocking solution (DAKO) for 30 min and permeabilization with 0.5% Tween 20 for

15 min. Then, we incubated the liver sections with an anti-AKT PHD antibody (SKB1, #05-591, Sigma-Aldrich) followed by a FITC-conjugated secondary antibody. After mounting, the liver sections were imaged with an LSM 980 laser-scanning confocal microscope (Carl Zeiss). Images were analyzed with ZEN Software (Carl Zeiss).

The AKT PH mCherry adenovirus ( $5 \times 10^8$  plaque-forming units) was delivered by systemic tail-vein injection into C57BL/6J mice after 8 weeks of HFD feeding and 2 weeks of treatment with 1.0 mg/kg candesartan or vehicle, as described previously<sup>2</sup>. Seven days after adenoviral infection, the livers were collected from the mice following an overnight fast and subsequent refeeding with HFD for 4 h. For immunofluorescence, formalin-fixed liver sections or cells were plated onto slide glass and counterstained with DAPI to visualize the nuclei. After mounting, the sections were imaged with a Zeiss LSM 700 laser-scanning confocal microscope (Carl Zeiss) and analyzed with ZEN Software (Carl Zeiss). Intracellular  $\text{Ca}^{2+}$  was quantified using NIH ImageJ software (<https://imagej.nih.gov/ij/>, 1997-2017). Data are presented as fold changes.

### **Measurement of intracellular $\text{Ca}^{2+}$ concentration and lipid accumulation**

For intracellular  $\text{Ca}^{2+}$  concentration and lipid accumulation, HepG2 cells were plated onto slide glass; treated with 0.5 mM PA for 16 h; incubated with 4  $\mu\text{M}$  Fura-2-AM (Teflabs), 5  $\mu\text{M}$  Calbryte 630 AM, or 2  $\mu\text{M}$  of BODIPY for 30 min in PBS at 37°C in the dark; and then washed for 10 min with PBS. Then cells were counterstained with 4,6-diamidino-2-phenylindole (DAPI) to visualize the nuclei. After mounting, the stained slides were imaged with a Zeiss LSM 700 or Zeiss LSM 980 laser-scanning confocal microscope (Carl Zeiss) and analyzed with ZEN 2010 Software (Carl Zeiss). Intracellular  $\text{Ca}^{2+}$  was quantified from the microscopy images using NIH ImageJ software (<https://imagej.nih.gov/ij/>, 1997-2017). Data are presented as fold changes.

### **Measurement of intracellular $\text{Ca}^{2+}$ concentration ( $[\text{Ca}^{2+}]_i$ )**

The  $[\text{Ca}^{2+}]_i$  signaling was measured using fura-2 AM, a fluorescent dye for cytosolic  $\text{Ca}^{2+}$ . Cells were attached to coverslips and incubated with 4  $\mu\text{M}$  fura-2 AM and 0.05% pluronic acid for 15 min at room temperature in the dark. The dye-loaded cells were then placed on an inverted microscope and perfused with physiological salt solution solutions to detect

[Ca<sup>2+</sup>]<sub>i</sub>. The [Ca<sup>2+</sup>]<sub>i</sub> was determined by the fura-2 ratio of dual excitation wavelengths 340 nm and 380 nm (emission wavelength is 530 nm). The emitted fluorescence was monitored by a CCD camera (Q-imaging) attached to an inverted microscope (Nikon, Japan) and analyzed with a Metafluor system (Molecular Devices, USA). For measurement of Ca<sup>2+</sup> influx, cells were stimulated with the sarco/endoplasmic reticulum Ca<sup>2+</sup> ATPase inhibitor cyclopiazonic acid (CPA) in Ca<sup>2+</sup>-free solution to deplete Ca<sup>2+</sup> stores and then administered 5 mM Ca<sup>2+</sup>-containing PBS.

### **RNA sequencing and data analysis**

Total RNA was isolated from liver tissues using the RNAiso Plus reagent (Takara, Shiga, Japan), and genomic DNA was removed by treatment with RNase-free DNase (Roche, Mannheim, Germany). The concentration and integrity of the RNA in each sample were measured on a 2100 Bioanalyzer (Agilent) with an RNA integrity threshold value  $\geq 8$ . A TruSeq RNA library kit (Illumina, San Diego, CA, USA) was used to prepare cDNA libraries. The resulting libraries were amplified by 15 cycles of PCR and then sequenced by Macrogen (Seoul, Korea) using a HiSeq™ 2000 sequencing system (Illumina) to produce 100-bp paired-end reads. Differentially expressed genes were analyzed using the Fisher's exact test, and multiplicity correction was performed using the Benjamini–Hochberg method on the resulting *p* values to control the false discovery rate (FDR). The exact *p* value and FDR *q* value resulting from the differential gene expression analysis can be found in the Source Data. Differentially regulated genes with an FDR value  $< 0.05$  were considered significant. We defined expressed genes as those with detectable expression in at least half of all samples. Expressed genes were subjected to principal component analysis (PCA). Principal components 1 and 2 were plotted in 2-D coordinates. Deposited Gene Expression Omnibus (GEO) RNA-seq genomic data are publicly available and contained in the Source Data. Moreover, we analyzed the enriched signaling pathways based on the differentially expressed genes identified using the Ingenuity Pathway Analysis software (IPA, QIAGEN). For the analysis, we removed the gene expressions with (a) log<sub>2</sub>-fold-change (log<sub>2</sub>FC) values between  $-1$  and  $1$ ; (b)  $p > 0.05$ ; (c) False Discovery Rate (FDR)  $> 0.05$ , and (d) FPKM  $< 1$  for all samples.

### **qRT-PCR analyses**

Total RNA was extracted from HepG2 cells and frozen liver, kidney, and adipose tissues with Trizol (Invitrogen) according to the manufacturer's protocol. RNA concentrations were measured on a Nanodrop spectrophotometer (Thermo Scientific). cDNA synthesis and real-time RT-PCR were performed using the TB Green Premix Ex Taq cDNA Synthesis kit (TaKaRa Bio, Tokyo, Japan) with 1 µg total RNA plus random hexamers in a BioRad CFX384. All expression values were normalized to the cyclophilin A mRNA level. Primer sequences are listed in **Supplementary Table 2 and 3**.

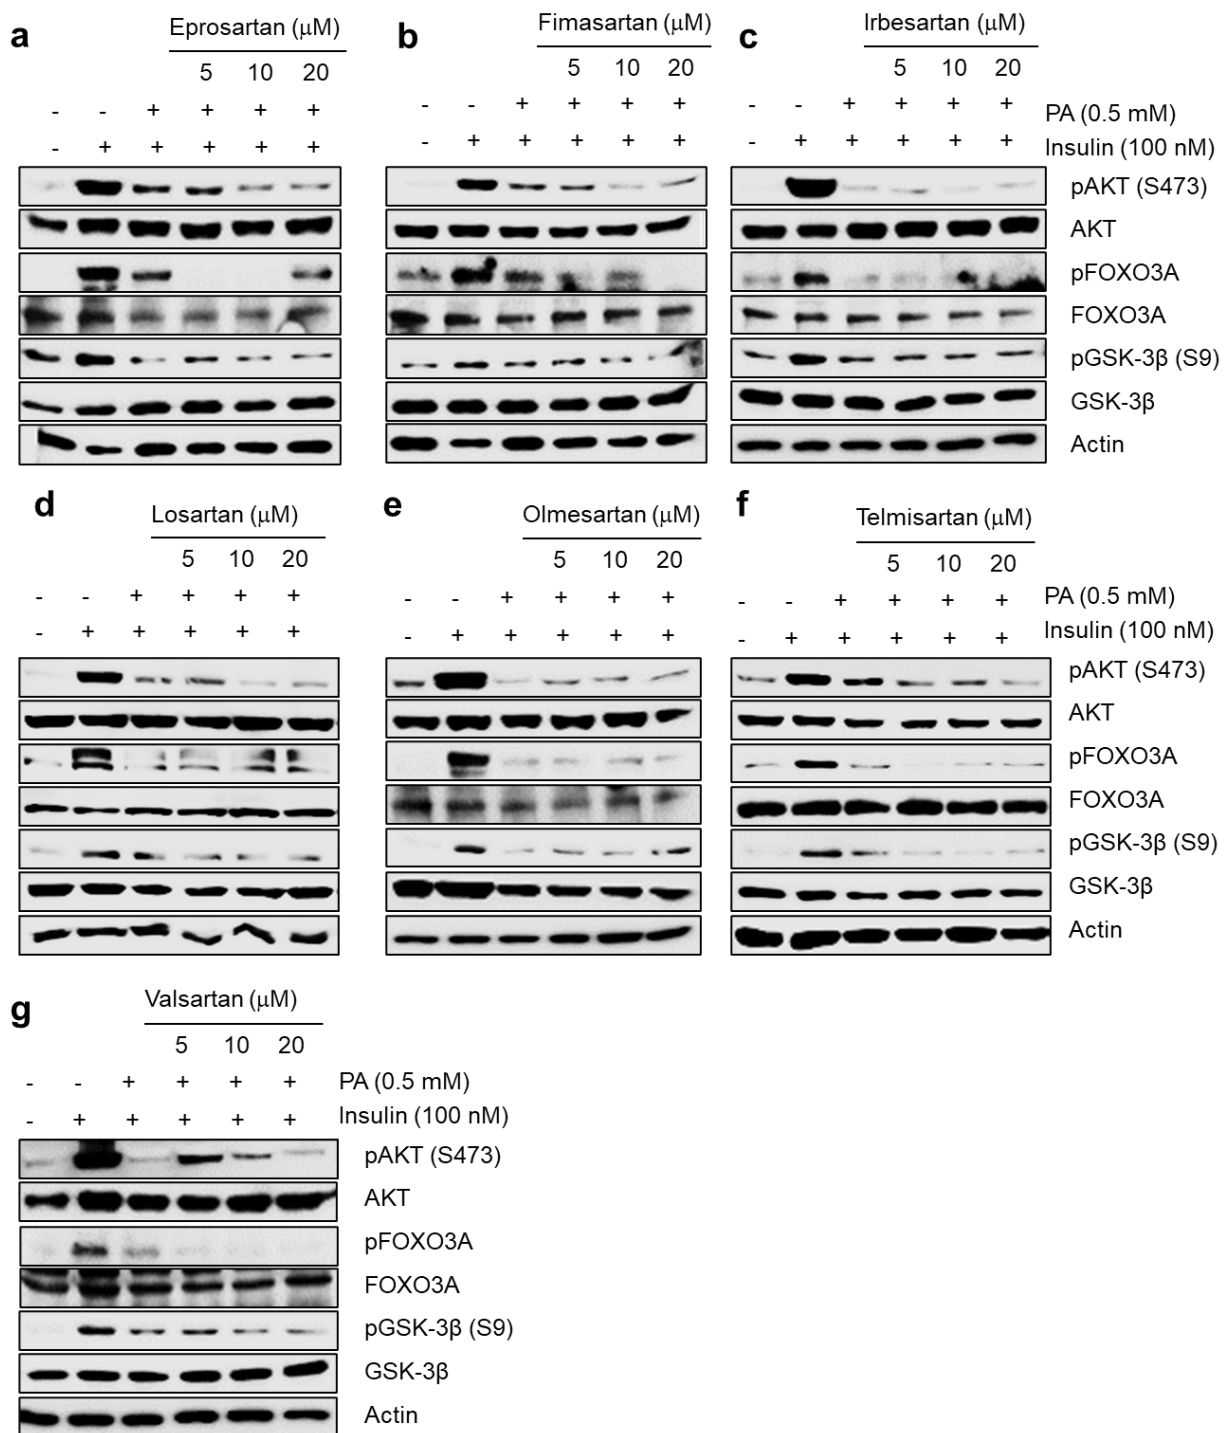

**Supplementary Fig. 1. The effects of ARBs on insulin signaling in PA-treated HepG2 cells.** (a-g) Immunoblot analysis of the human HepG2 cell lysates treated with 0.5 mM PA and the indicated concentrations of ARBs for 16 h followed by treatment with 100 nM insulin for 15 min.

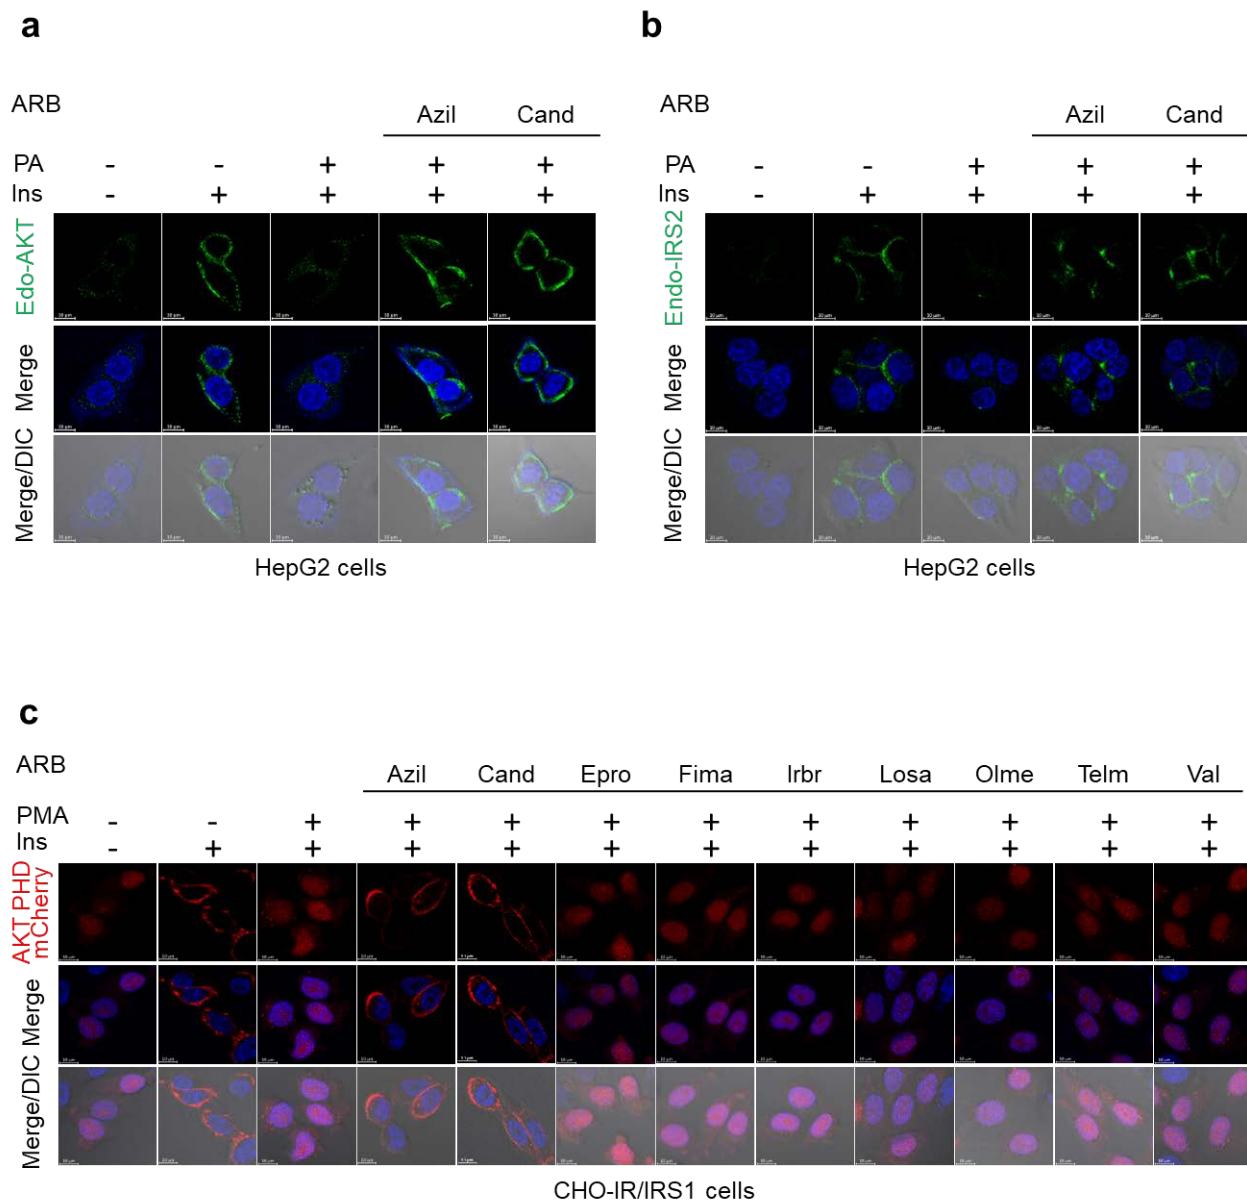

**Supplementary Fig. 2. The effects of ARBs on membrane localization of the Akt PH domain, endogenous AKT, and endogenous IRS2.** (a) Representative fluorescence images of endogenous AKT in HepG2 cells. (b) Representative fluorescence images of endogenous IRS2 in HepG2 cells. HepG2 cells were treated with 0.5 mM PA and the indicated ARBs for 16 h, serum-starved for 3 h, stimulated with 100 nM insulin for 15 min, counterstained with 4,6-diamidino-2-phenylindole (DAPI) for nuclei, and observed using differential interference contrast (DIC) microscopy. (c) Representative fluorescence images of CHO-IR cells harboring Akt PH domain-mCherry fusion vector. CHO-IR cells were transfected with Akt PH domain-mCherry fusion vector, treated with 100 nM PMA or 100 nM PMA and the indicated ARBs for 16 h, serum-starved for 3 h, stimulated with 100

nM insulin for 15 min, counterstained with 4,6-diamidino-2-phenylindole (DAPI) for nuclei, and observed using differential interference contrast (DIC) microscopy.



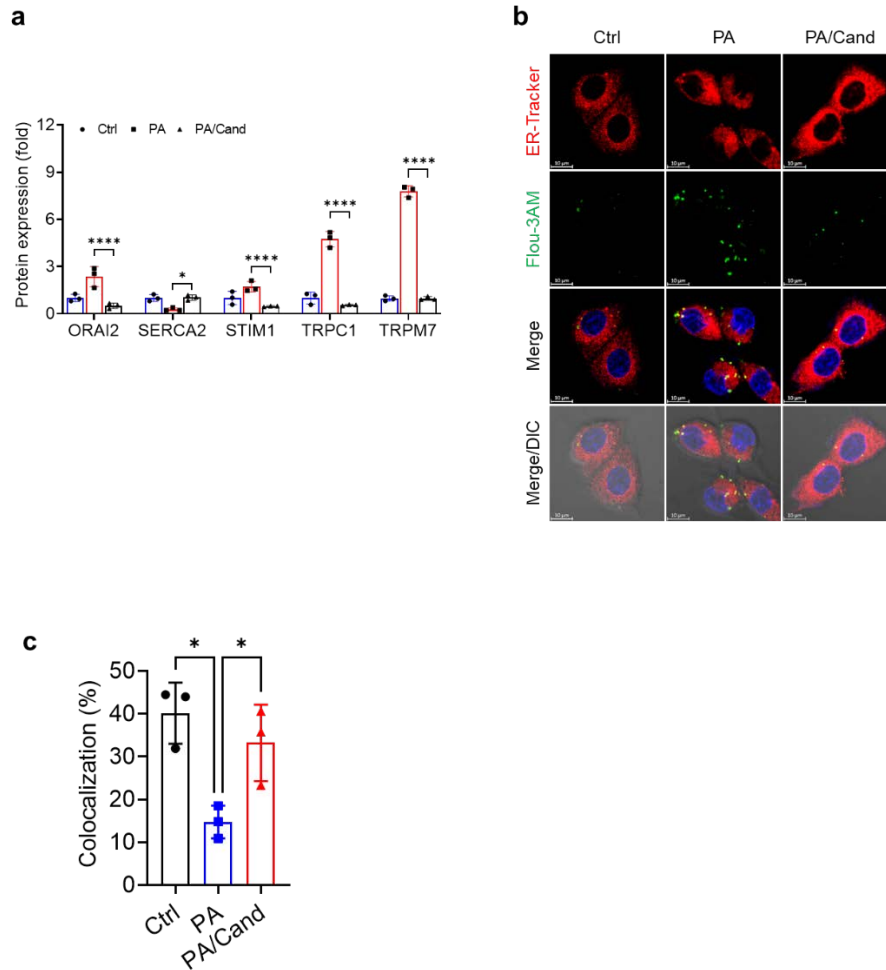

**Supplementary Fig. 3. Candesartan normalizes dysregulated intracellular  $\text{Ca}^{2+}$  homeostasis by inhibiting store-operated  $\text{Ca}^{2+}$  entry (SOCE). (a)** Quantification of the protein immunoblots in Figure 3H using ImageJ. All data are presented as the mean  $\pm$  SD ( $n = 4\text{--}6$  per group). \*,  $p < 0.05$ ; \*\*,  $p < 0.01$ ; \*\*\*,  $p < 0.001$ , \*\*\*\*,  $p < 0.0001$ , compared with controls. **(b)** Representative Fluo-3 AM images of cytosolic  $\text{Ca}^{2+}$  and ER Tracker images of the endoplasmic reticulum (ER) in HepG2 cells treated with vehicle, 0.5 mM PA, or 0.5 mM PA and 10  $\mu\text{M}$  candesartan. HepG2 cells were incubated with the cytosolic  $\text{Ca}^{2+}$  indicator Fluo-3 AM (4  $\mu\text{M}$ ) and ER Tracker (1  $\mu\text{M}$ ) for 45 min, and visualized by confocal microscopy (scale bar 10  $\mu\text{m}$ ). Fluo-3 AM localized to the cytoplasm in a punctate distribution, thereby reflecting intracellular free  $\text{Ca}^{2+}$ . **(c)** Colocalization between Mag-Fluo-3 AM and ER tracker in HepG2 cells treated with vehicle, 0.5 mM PA, or 0.5 mM PA and 10  $\mu\text{M}$  candesartan. All data are presented as the mean  $\pm$  standard deviation (SD) ( $n = 3$  per group). \*,  $p < 0.05$ ; \*\*,  $p < 0.01$ ; \*\*\*,  $p < 0.001$ , \*\*\*\*,  $p < 0.0001$ , compared with controls.

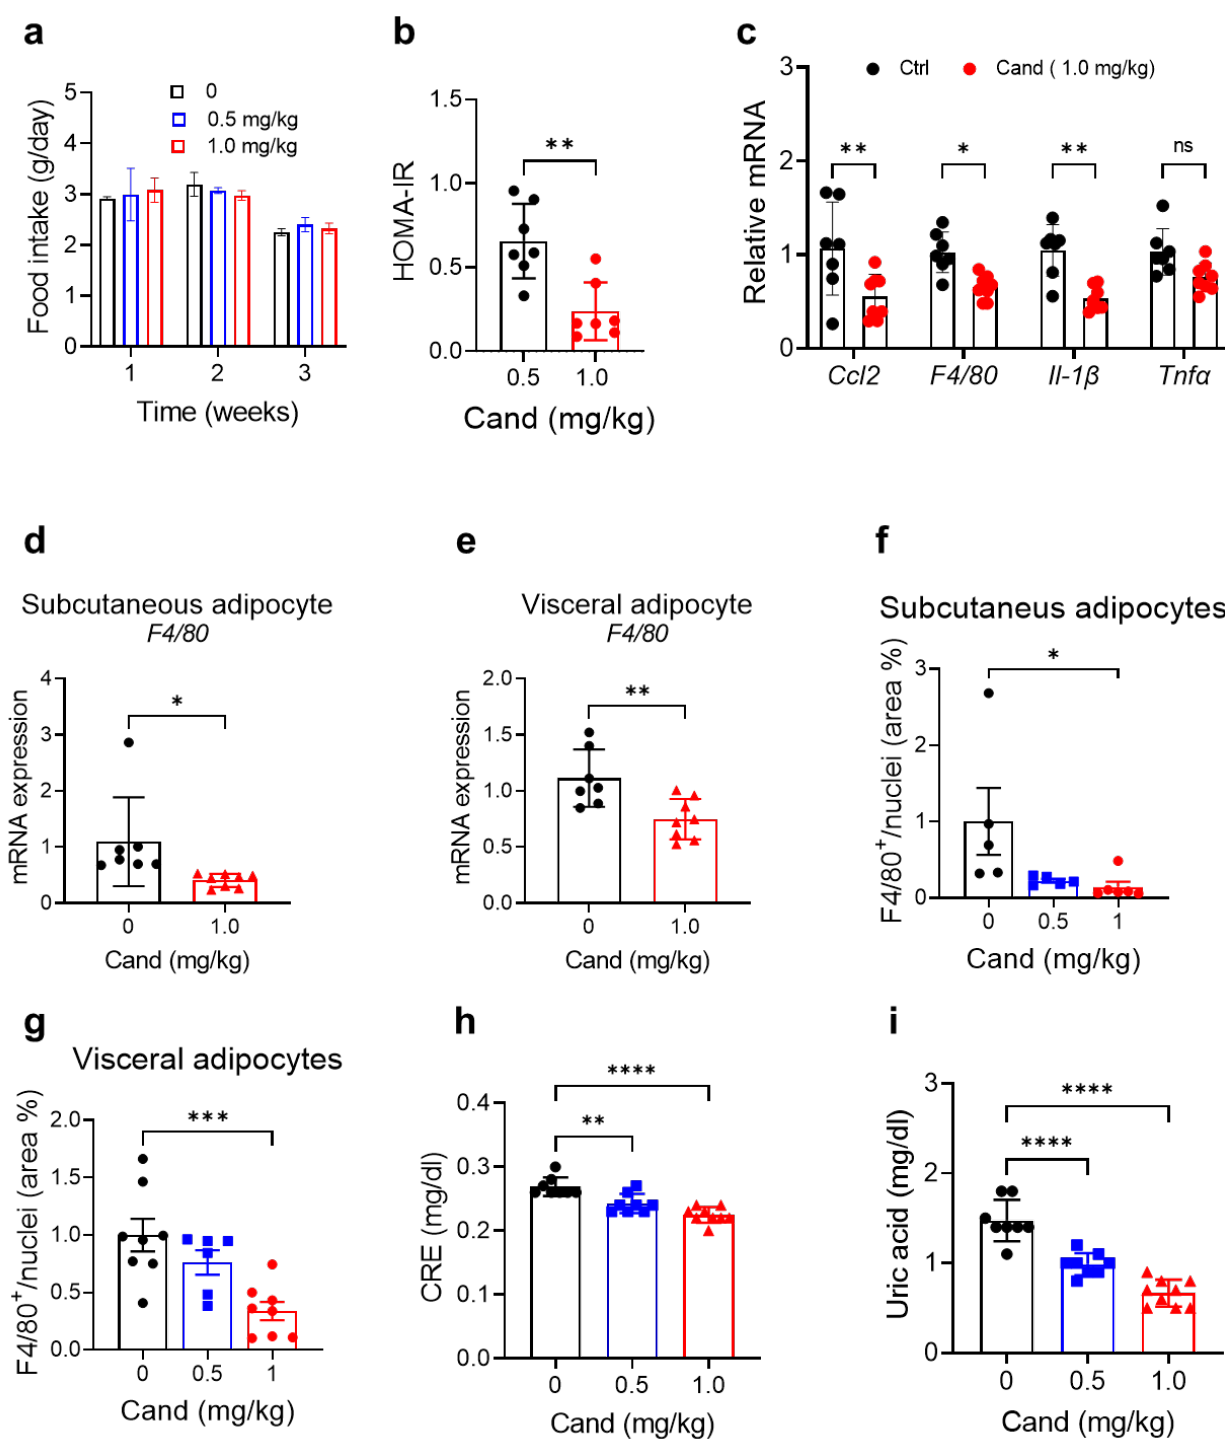

**Supplementary Fig. 4. Candesartan alleviates insulin resistance and tissue inflammation. (a)** Food intake of the mice during candesartan administration. **(b)** HOMA-IR index. The reciprocal HOMA-IR was calculated as (fasting glucose  $\times$  fasting insulin)/405. **(c)** Relative mRNA expression of *Ccl2*, *F4/80*, *Il-1 $\beta$* , and *Tnfa* in the livers

of mice fed a 60% HFD with vehicle or 0.5 mg/kg or 1.0 mg/kg candesartan. **(d)** Relative mRNA expression of *F4/80* in subcutaneous adipocytes of mice fed a 60% HFD with vehicle, or 0.5 mg/kg or 1.0 mg/kg candesartan. **(e)** Relative mRNA expression of *F4/80* in visceral adipocytes of mice fed a 60% HFD with vehicle or 0.5 mg/kg or 1.0 mg/kg candesartan. **(f)** The F4/80-positive area of subcutaneous adipocyte sections was quantified using Image J software. **(g)** The F4/80-positive area of visceral adipocyte sections was quantified using Image J software. **(h,i)** Serum levels of CRE **(h)**, and Uric acid **(i)** were measured with a Beckman Coulter AU480 chemistry analyzer.

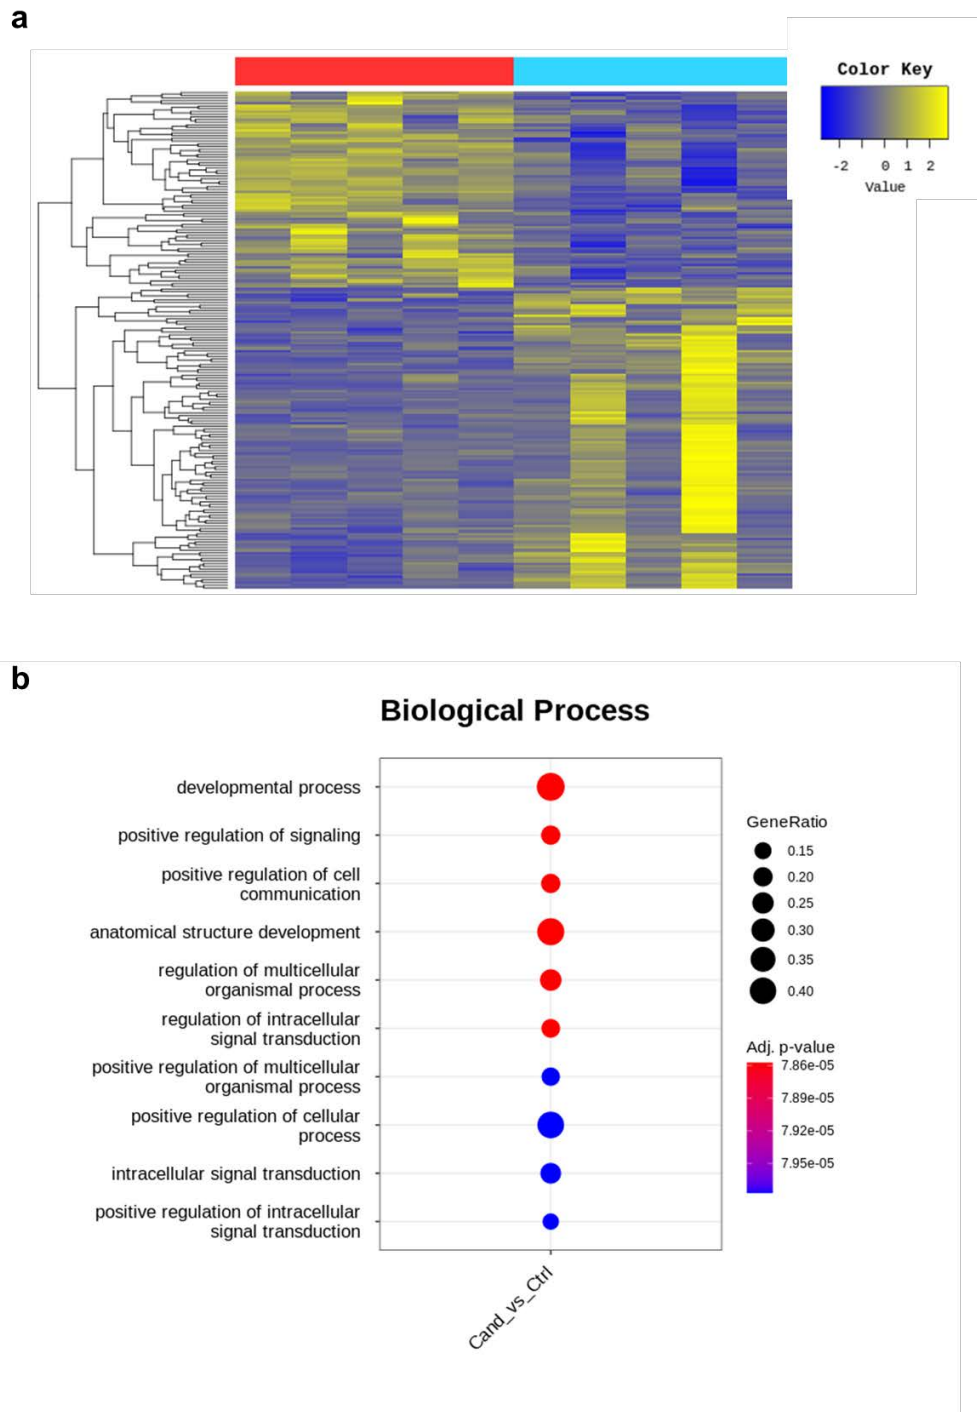

**Supplementary Fig. 5. Candesartan alters the hepatic metabolism transcriptome.** (a) Hierarchical clustering heatmap of differentially expressed genes. (b) Gene set enrichment analysis (GSEA) with gene ontology gene-sets reveals molecular pathways related to the positive regulation of signaling pathways and intracellular signaling.

**a**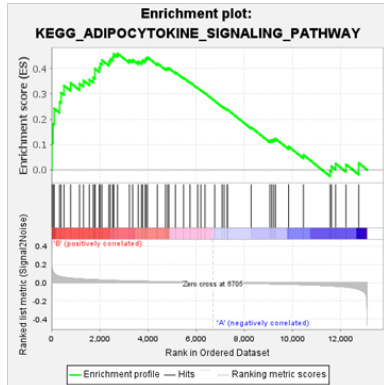

NES= 1.61, P&lt;0.002

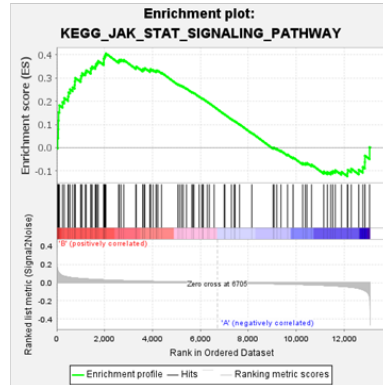

NES=1.57, P&lt;0.04

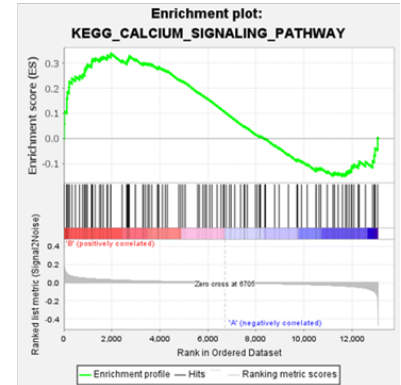

NES=1.35, P &lt;0.04

**b**

Adipokine Signaling

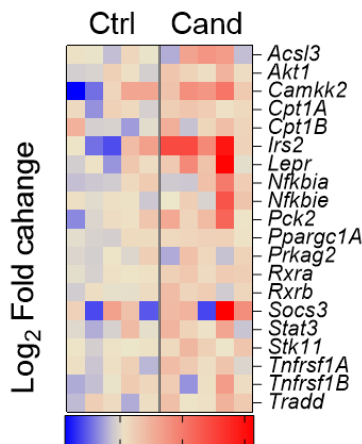

JAK\_STAT signaling

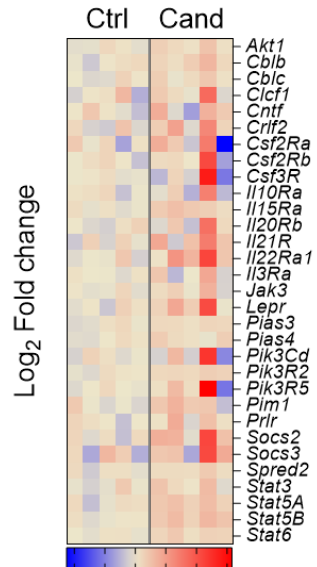

Calcium signaling

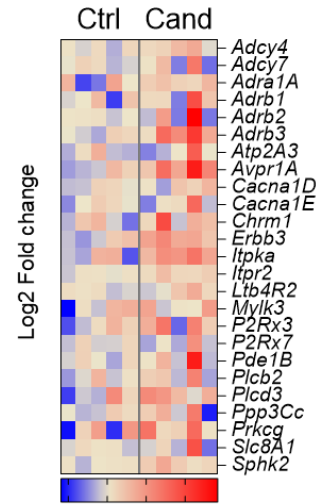

**Supplementary Fig. 6. Candesartan alters the hepatic metabolism transcriptome.** (a) Enrichment plot showing the upregulation of the adipokine signaling pathway, JAK-STAT pathway, and calcium signaling. (b) Functional clustering heatmap of differentially expressed genes associated with adipokine signaling, JAK-STAT signaling, and calcium signaling.

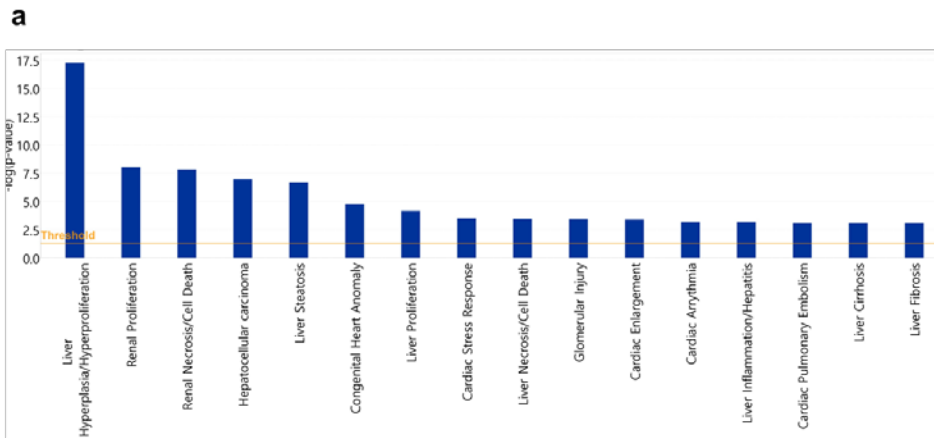

**b**

| Categories                                    | Diseases or Functions<br>Annotation | p-value  | Predicted<br>Activation<br>State | Activation<br>z-score |
|-----------------------------------------------|-------------------------------------|----------|----------------------------------|-----------------------|
| Liver Hyperplasia/Hyperproliferation          | Liver cancer                        | 5.31E-18 | Decreased                        | -2.267                |
| Liver Hyperplasia/Hyperproliferation          | Liver carcinoma                     | 1.27E-17 | Decreased                        | -2.645                |
| Liver Hyperplasia/Hyperproliferation          | Liver tumor                         | 8.39E-17 | Decreased                        | -2.589                |
| Liver Inflammation/Hepatitis, Liver Steatosis | Steatohepatitis                     | 0.00617  | Decreased                        | -2.219                |

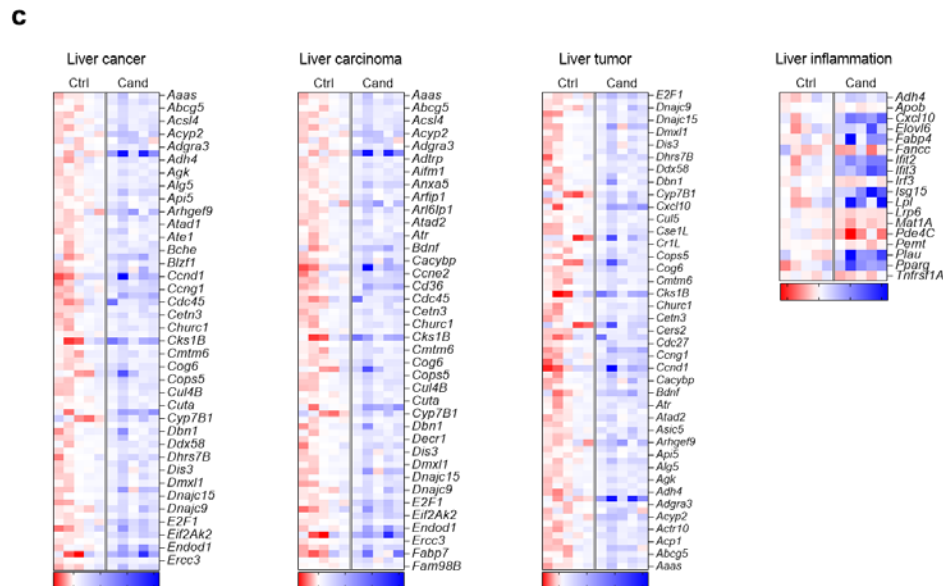

**Supplementary Fig. 7.** IPA analysis of transcriptome data indicates changes in several hepatotoxicity-related pathways after treating mice fed a HFD with 1 mg/kg candesartan including hyperplasia, steatosis, and carcinoma. **(a,b)** The most prominently affected pathways (“Tox Functions”) are depicted, as identified using the IPA software. The yellow line represents a value of  $-\log(0.05)$ , indicating that all bars above are statistically significant. **(c)** Functional clustering heatmap of differentially expressed genes associated with liver cancer, liver carcinoma, liver tumor, and liver inflammation.

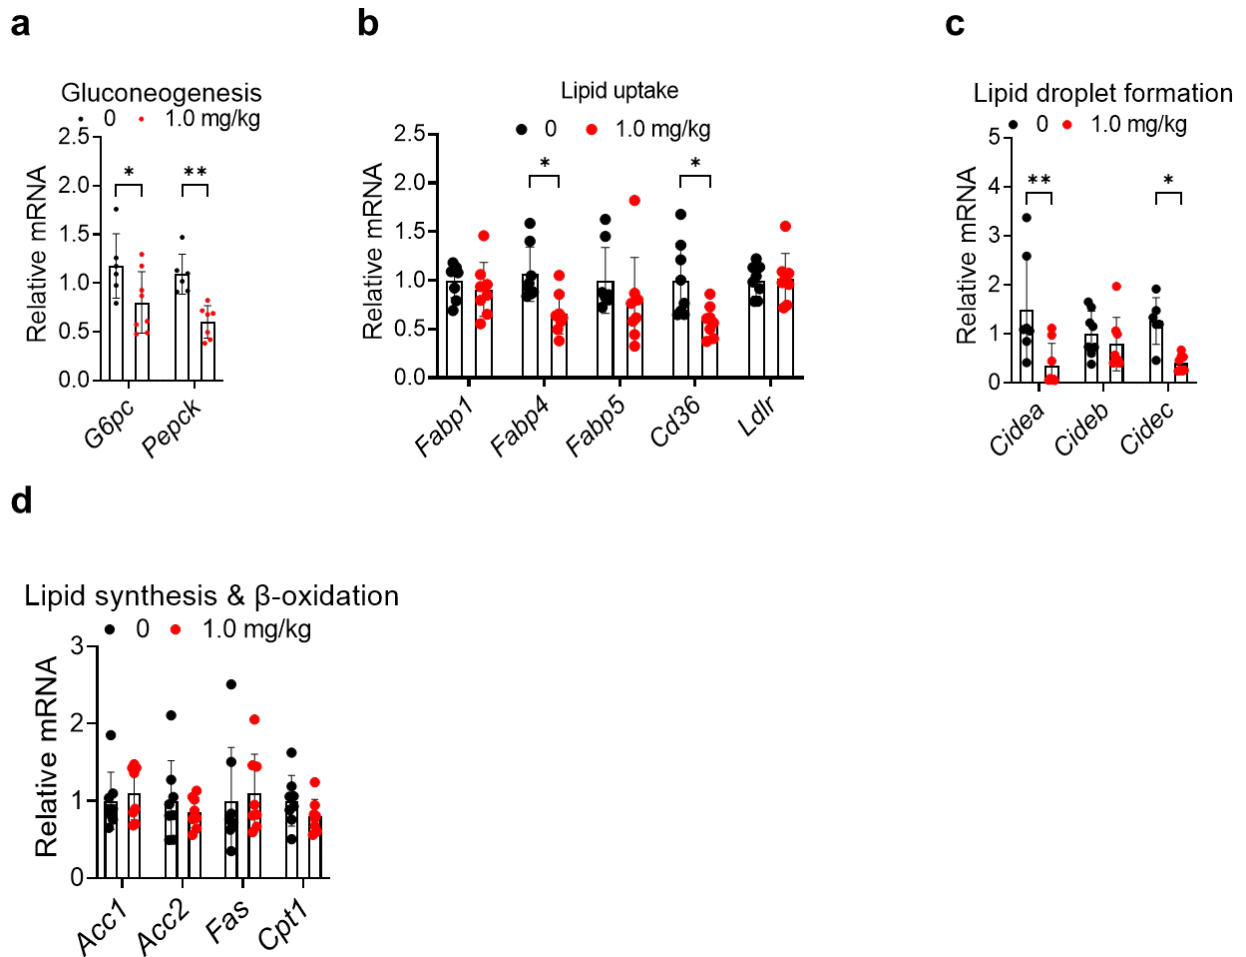

**Supplementary Fig. 8. Candesartan suppresses the expression of genes associated with gluconeogenesis and lipid metabolism. (a–d)** Relative mRNA expression of genes associated with gluconeogenesis (a), lipid uptake (b), lipid droplet formation (c), and lipid synthesis and  $\beta$ -oxidation (d) in the livers of mice fed a 60% HFD with vehicle or 1.0 mg/kg candesartan.

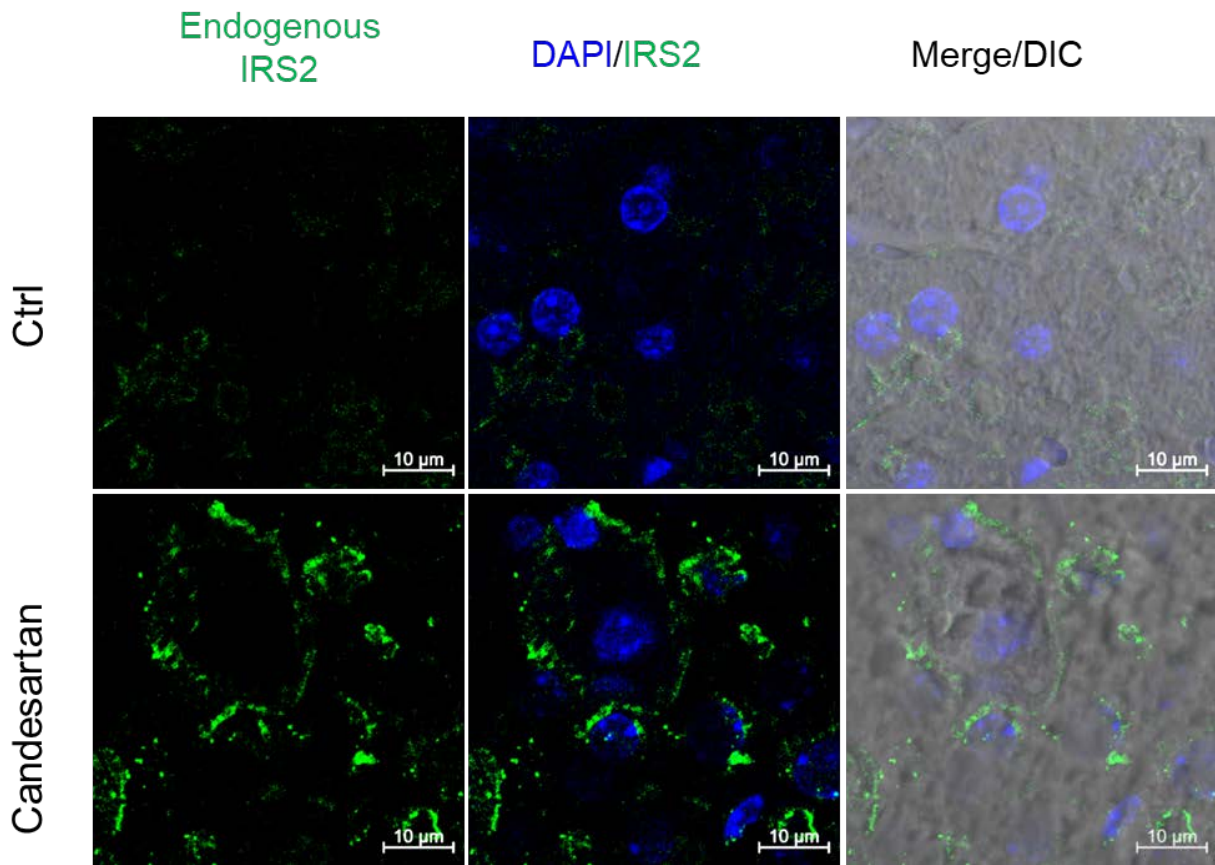

**Supplementary Fig. 9. Candesartan enhances insulin signaling by stimulating postprandial membrane localization of endogenous IRS2 in HFD-fed mice.** Representative fluorescence images of endogenous IRS2 from mice administered vehicle or 1.0 mg/kg candesartan. Endogenous IRS2-expressing *ex vivo* hepatocytes from formalin-fixed liver sections of mice after 16 h of fasting and subsequent refeeding with a HFD for 4 h were visualized by confocal microscopy (scale bars 10  $\mu$ m).



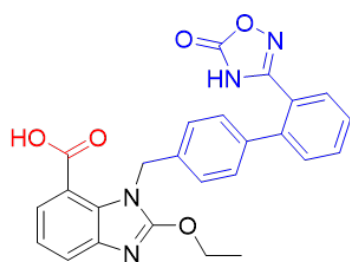

azilsartan

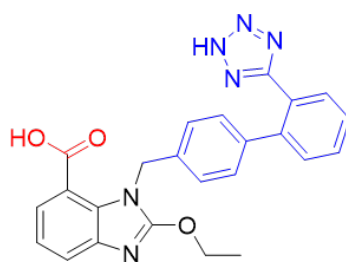

candesartan

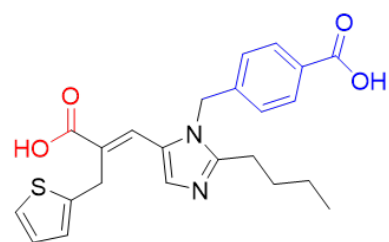

eprosartan

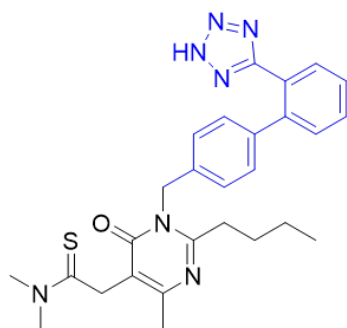

Fimasartan

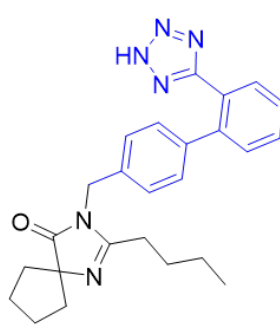

irbesartan

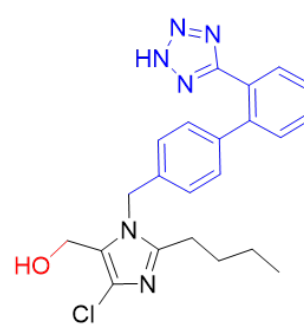

losartan

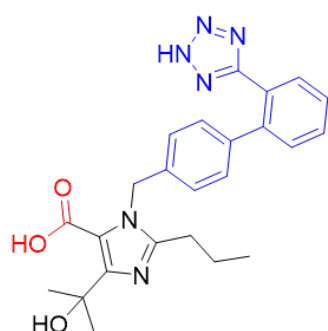

olmesartan

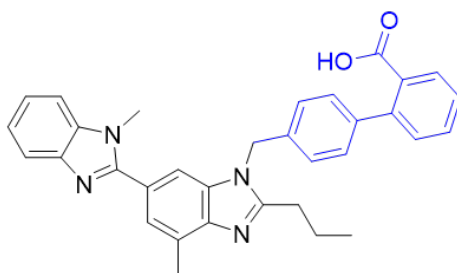

telmisartan

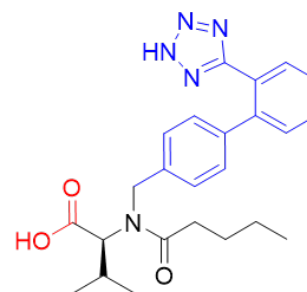

valsartan

**Supplementary Fig. 10. Chemical structures of angiotensin II receptor blockers (ARBs).**

**Supplementary Table 1. List of antibody, source, application and dilution**

| Antibody                                           | Catalog Number                 | Application | Dilution |
|----------------------------------------------------|--------------------------------|-------------|----------|
| Rabbit anti-AKT                                    | Cell signaling, C67E7, #4691   | WB          | 1:5000   |
| Rabbit anti-phospho-AKT S473                       | Cell signaling, D9E, #4060     | WB          | 1:3000   |
| Rabbit GSK-3 $\beta$                               | Cell signaling, (27C10), #9315 | WB          | 1:3000   |
| Rabbit Phospho-GSK-3 $\beta$ S9                    | Cell signaling, #9336          | WB          | 1:3000   |
| Rabbit AS160                                       | Cell signaling, #2670          | WB          | 1:3000   |
| Rabbit anti-phospho-AS160 Thr642                   | Cell signaling, D27E6 #8881    | WB          | 1:3000   |
| Rabbit STIM2                                       | Cell signaling, #4917          | WB          | 1:3000   |
| Rabbit Anti-FOXO1A                                 | Abcam, ab52857                 | WB          | 1:1000   |
| Rabbit Anti-phospho-FOXO1A S253                    | Abcam, ab259337                | WB          | 1:1000   |
| Rabbit Anti-NUR77 antibody                         | Abcam, ab153914                | WB          | 1:1000   |
| Rabbit Anti-PPAR alpha                             | Abcam, ab215270                | WB          | 1:1000   |
| Rabbit Anti-PPAR gamma                             | Abcam, ab209350                | WB          | 1:1000   |
| Rabbit Anti-Stromal interaction molecule 1 (STIM1) | Abcam, ab108994                | WB          | 1:3000   |
| Rabbit Anti-SERCA2 ATPase                          | Abcam, ab150435                | WB          | 1:1000   |
| Rabbit Anti-TRPC1                                  | Abcam, ab192031                | WB          | 1:3000   |
| Rabbit Anti-TRPM7                                  | Abcam, ab245408                | WB          | 1:500    |
| Rabbit Anti-FOXO3a/FKHRL1                          | Millipore, 07-702              | WB          | 1:1000   |
| Rabbit Anti-phospho-FKHRL1/FOXO3A Thr32            | Millipore, 07-695              | WB          | 1:1000   |
| Goat ITPR2                                         | Novusbio, NB100-2466           | WB          | 1:1000   |
| Rabbit ORAI2                                       | Proteintech, 20592-1-AP        | WB          | 1:1000   |
| Rabbit anti-ATP2B2 / PMCA2                         | LS-bio, LS-C348973             | WB          | 1:1000   |
| Rabbit anti-TRPM4                                  | LS-Bio, LS-C408114             | WB          | 1:1000   |
| Rabbit CD36                                        | Bioss, bs-8873                 | WB          | 1:1000   |
| Mouse Nurr1                                        | Santa cruz, sc-376984          | WB          | 1:500    |
| Rabbit XBP1                                        | Santa cruz, sc-7160            | WB          | 1:500    |
| Mouse Anti- $\beta$ -Actin, clone C4               | Millipore, MAB1501             | WB          | 1:10000  |
|                                                    |                                |             |          |
| Rat F4/80 Monoclonal                               | eBioscience™, BM8 14-4801-82   | IHC         | 1:50     |

|                                                                      |                            |    |       |
|----------------------------------------------------------------------|----------------------------|----|-------|
| Anti-Akt/PKB Antibody, PH Domain, clone SKB1                         | Millipore, 05-591          | IF | 1:500 |
|                                                                      |                            |    |       |
| Goat Anti-Rabbit IgG H&L (HRP)                                       | Abcam, ab672               |    |       |
| Rabbit Anti-Mouse IgG H&L (HRP)                                      | Abcam, ab6728              |    |       |
| Rabbit Anti-Rat IgG H&L (HRP)                                        | Abcam, ab6734              |    |       |
| Rabbit Anti-Goat IgG H&L (HRP)                                       | Abcam, ab6741              |    |       |
| Goat anti-Mouse IgG (H+L) Cross-Adsorbed Secondary, Alexa Fluor™ 488 | Thermo Scientific, A-11001 |    |       |

**Supplementary Table 2. The qRT-PCR primer lists for mouse genes**

| Gene   | Gene Bank No.  | Primer  | Primer Sequence                  |
|--------|----------------|---------|----------------------------------|
| ITPR3  | NM_080553.3    | Forward | 5'-CGTCTGGGCTTTGTGGATGTG         |
|        |                | Reverse | 5'-TGACCTGAAGGAAGGGCAGTG         |
| ORAI1  | NM_175423.3    | Forward | 5'-GGAAATGGCTCGGGGACAAA          |
|        |                | Reverse | 5'-CTAGCCCCAGCAACACAGTT          |
| ORAI2  | NM_178751.3    | Forward | 5'-ACACATCCCAAGAGCCACAG          |
|        |                | Reverse | 5'-ACCCTTATTCATGCGGGGAC          |
| PMCA2  | NM_009723.6    | Forward | 5'_CTA GAG CCG GCA AGA CAT GG    |
|        |                | Reverse | 5'_CTG GCA TCT ACA TGG TCG GG    |
| SERCA1 | NM_007504.2    | Forward | 5'-TAAAGTCCTCCACCCTCGTC          |
|        |                | Reverse | 5'-CTAGTCAGTTGCCTTGTGCC          |
| SERCA2 | NM_001110140.3 | Forward | 5'-GCTTCTTCTGTAGGTCTGATGGT       |
|        |                | Reverse | 5'-TAGGCGAAGGGACAGAAACC          |
| STIM1  | NM_009287.4    | Forward | 5'-CCCATCAGCATCAGCACTAC          |
|        |                | Reverse | 5'-TGGTTCAAATATAACATCCTTGCC      |
| TRPC1  | NM_011643.3    | Forward | 5'-GCAAACCCGTTTTTGTTCGCA         |
|        |                | Reverse | 5'-CACTGATAGCTGCCCTCTT           |
| TRPM4  | NM_175130.4    | Forward | 5'-GAAGCCCGGGATCGGATTAG          |
|        |                | Reverse | 5'-TCAGCAACTCCTTTCGGGTC          |
| TRPM7  | NM_021450.2    | Forward | 5'_GCA GCT TTG TTA CCG GAT TGG   |
|        |                | Reverse | 5'_ACG GGC TTA AAT GGA GAA GCA   |
| CCI2   | NM_011331      | Forward | 5'-TTAAAAACCTGGATCGGAACCAA       |
|        |                | Reverse | 5'-GCATTAGCTTCAGATTTACGGG        |
| F4/80  | NM_153100.1    | Forward | 5'-GCCTATTATCTATAACCCTCCAGCACATC |
|        |                | Reverse | 5'-TCCATCTCCATCCTCCACATCAG       |
| IL1B   | NM_008361.4    | Forward | 5'-TCCATTGAGGTGGAGAGCTTTC        |
|        |                | Reverse | 5'-CTACAGGCTCCGAGATGAACAAC       |
| TNF-a  | NM_013693      | Forward | 5'-AGACCCTCACACTCAGATCATCTTC     |
|        |                | Reverse | 5'-CCTCCACTTGGTGGTTTGCT          |
| ATF3   | NM_007498.3    | Forward | 5'-CCTTATCATCCCGGCCAGTC          |
|        |                | Reverse | 5'-GTCCCACCCACCTATCAAG           |
| ATF4   | NM_009716.3    | Forward | 5'-CGCTCTTCACGAAATCCAGC          |
|        |                | Reverse | 5'-TCATGTTGTGGGGCTTTGCT          |
| ATF6   | NM_001081304.1 | Forward | 5'-CTTGCTTGTACGCAACTCC           |
|        |                | Reverse | 5'-GCACTGCCACCAGAGAATTG          |
| IRE1a  | NM_023913.2    | Forward | 5'-GCCCTCAGCATGATGGACTT          |
|        |                | Reverse | 5'-TGTCTTGCCTCCAAAGGATGT         |

|         |                |         |                                |
|---------|----------------|---------|--------------------------------|
| XBP1    | NM_013842.3    | Forward | 5'-ATCGCAGGGAGGGTCATTTG        |
|         |                | Reverse | 5'-TGGGGTCAAGAGGGTCAGAA        |
| XBP1s   |                | Forward | 5'-GAGTCCGCAGCAGGTG            |
|         |                | Reverse | 5'-GTGTCAGAGTCCATGGGA          |
| CEBPB   | NM_009883.4    | Forward | 5'-GACAAGCTGAGCGACGAGTA        |
|         |                | Reverse | 5'-GTCAGCTCCAGCACCTTGT         |
| ChREBP  | NM_021455.4    | Forward | 5'-ATGCGGGACATGTTTGATGA        |
|         |                | Reverse | 5'-TCGGATGAGGATGCTGAACAC       |
| NFkB    | NM_008689      | Forward | 5'-TGGCAGCTCTTCTCAAAGCA        |
|         |                | Reverse | 5'-CCCAAGAGTCGTCCAGGTCAT       |
| NRF2    | NM_010902.5    | Forward | 5'-GCCCTCAGCATGATGGACTT        |
|         |                | Reverse | 5'-TGTCTTGCCTCCAAAGGATGT       |
| Nurr1   | NM_013613.2    | Forward | 5'-AGCTGGTTGAAGTGTCCAGT        |
|         |                | Reverse | 5'-GCAGGTTAGGAAATAGCGACA       |
| Nur77   | NM_010444.2    | Forward | 5'-GGTTCCTGGACGTTATCCG         |
|         |                | Reverse | 5'-GGCGGAGGATGAAGAGTTCC        |
| PPARa   | NM_011144.6    | Forward | 5'-CGCTCCCGACCCATCTTTAG        |
|         |                | Reverse | 5'-ACTGGGCTACATCCTCGACT        |
| PPARd   | NM_011145.3    | Forward | 5'-ACCAGCAGCCTAAAAGCAGT        |
|         |                | Reverse | 5'-CCCAGAGAGAGCGTAGTGTT        |
| PPARg   | NM_011146      | Forward | 5'-CAGGCCGAGAAGGAGAAGCT        |
|         |                | Reverse | 5'-GGCTCGCAGATCAGCAGACT        |
| SREBP1c | NM_011480.3    | Forward | 5'-GTACCTGCGGGACAGCTTAG        |
|         |                | Reverse | 5'-TCAGGTCATGTTGGAAACCA        |
| G6PC    | NM_008061.3    | Forward | 5'-GGCGCAGCAGGTGTATACTATGT     |
|         |                | Reverse | 5'-CAAACACCGGAATCCATACGT       |
| PEPCK   | NM_011044.2    | Forward | 5'-CGCAAGCTGAAGAAATATGACAA     |
|         |                | Reverse | 5'-TCGATCCTGGCCACATCTC         |
| FABP1   | NM_017399.5    | Forward | 5'-AAGGGAAGGACATCAAGGGG        |
|         |                | Reverse | 5'-GGTGAACTCATTGCGGACCA        |
| FABP4   | NM_024406.4    | Forward | 5'-GTCACCATCCGGTCAGAGAG        |
|         |                | Reverse | 5'-CCTGTCTGTCTGCGGTGATTT       |
| FABP5   | NM_010634.3    | Forward | 5'-ACGGGAAGGAGAGCACGATA        |
|         |                | Reverse | 5'-AGCCCTCATTGCACCTTCTC        |
| CD36    | NM_007643      | Forward | 5'-ATACAGAGTTCGTTATCTAGCCAAGGA |
|         |                | Reverse | 5'-CCATTGGGCTGTACAAAAGACA      |
| Ldlr    | NM_001252658.1 | Forward | 5'-CCCTTCTCCTTGGCCATCTAT       |
|         |                | Reverse | 5'-GAGTCGATTGGCACTGAAAATG      |
| Cidea   | NM_007702.2    | Forward | 5'-GGGACAACACGCATTTTCATG       |
|         |                | Reverse | 5'-GTTGCTTGCAGACTGGGACAT       |
| Cideb   | NM_026925.3    | Forward | 5'-ACAGTCCGGAAAGGACTGACA       |

|       |             |         |                               |
|-------|-------------|---------|-------------------------------|
| Cidec | NM_178373.3 | Reverse | 5'-CACTCCACGTAGCAGCAAGGT      |
|       |             | Forward | 5'-CCATCAGAACAGCGCAAGAA       |
| Acc1  | NM_133360.2 | Reverse | 5'-ACTGGGCTACATCCTCGACT       |
|       |             | Forward | 5'-CTGAAGCAGATCCGCAGCTT       |
| Acc2  | NM_133904.2 | Reverse | 5'-GGTGAGA TGTGCTGGGTCATG     |
|       |             | Forward | 5'-TGGAGTCCATCTTCCTGTCC       |
| FAS   | NM_007988.3 | Reverse | 5'-CGAATATGGTCGTTTCTGAAAGT    |
|       |             | Forward | 5'-GAAGAAGTGTCTGGACTGTGTCATTT |
| Cpt1  | NM_013495.2 | Reverse | 5'-TTAATTGTGGGATCAGGAGAGCAT   |
|       |             | Forward | 5'-TCGTGGTGGTGGGTGTGAT        |
|       |             | Reverse | 5'-GGGTCCGATTGATCTTTGCA       |

---

---

**Supplementary Table 3. The qRT-PCR primer lists for human genes**

| Gene    | Gene Bank No.  | Primer  | Primer Sequence                  |
|---------|----------------|---------|----------------------------------|
| hITPR1  | NM_001099952.2 | Forward | 5'_CGG AGC AGG GTA TTG GAA CA    |
|         |                | Reverse | 5'_CTG AGG GCT GAA ACT CCA GG    |
| hITPR2  | NM_002223.3    | Forward | 5'_CTT CAT CAG CAC CTT GGG GT    |
|         |                | Reverse | 5'_GGC ACA CCT TGA AAA GGC AG    |
| hITPR3  | NM_002224.3    | Forward | 5'_GCT TCA TCA GCA CTT TGG GG    |
|         |                | Reverse | 5'_ATG GGG CAC ACC TTG AAG AG    |
| hORAI1  | NM_032790.3    | Forward | 5'_AAG CTT AAA GCC TCC AGC CG    |
|         |                | Reverse | 5'_GTG GGT AGT CGT GGT CAG C     |
| hORAI2  | NM_001271819.1 | Forward | 5'_ATG GGA TGG AGA GCC TGA GT    |
|         |                | Reverse | 5'_GGT ACT GGT ACT GCG TCT CC    |
| hPMCA2  | NM_001001331.3 | Forward | 5'_GGT GTG AAG AAG GGG GAT GG    |
|         |                | Reverse | 5'_CTA GGC TGG CAT TCG CAC TA    |
| hSERCA1 | NM_004320.4    | Forward | 5'_GTG GGA GCT GGT GAT AGA GC    |
|         |                | Reverse | 5'_TCA CCT TCC TCA AAC CAG GC    |
| hSERCA2 | NM_001681.3    | Forward | 5'_TTG CTC GAG TTG AAC CCT CC    |
|         |                | Reverse | 5'_CGG CTT TCT TCA GAG CAG GA    |
| hSTIM1  | NM_003156.3    | Forward | 5'_TTG TGT CTC CCT TGT CCA TGC   |
|         |                | Reverse | 5'_GGG TCA AAT CCC TCT GAG ATC C |
| hTRPC1  | NM_001251845.1 | Forward | 5'_AAG CTT TTC TTG CTG GCG TG    |
|         |                | Reverse | 5'_CTC CCA AGC ACA TCT ACG CA    |
| hTRPM7  | NM_017672.5    | Forward | 5'_GAG GAG GAG GAG GTG GAG TT    |
|         |                | Reverse | 5'_TCC CTC TTG GTC AAA GTG CT    |

**References**

- 1 Kim, O.-H. *et al.* Externalized phosphatidylinositides on apoptotic cells are eat-me signals recognized by CD14. *Cell Death Differ.* **29**, 1423-1432 (2022).
- 2 Kang, J. K. *et al.* Increased intracellular Ca<sup>2+</sup> concentrations prevent membrane localization of PH domains through the formation of Ca<sup>2+</sup>-phosphoinositides. *Proc. Natl. Acad. Sci. U S A* **114**, 11926-11931 (2017).
